# Supplementary material
Source: PubMed Central journal article supplement (PMC5628052)
Supplement: NIHMS902785-supplement-Supplementary_file.pdf [file NIHMS902785-supplement-Supplementary_file.pdf]

Supplementary Table S1

| Patient      | NML--> NEL  | NML --> CEL |
|--------------|-------------|-------------|
| 1            | 287         | 45          |
| 2            | 80          | 23          |
| 3            | 916         | 91          |
| 4            | 308         | 16          |
| 5            | 167         | 32          |
| 6            | 585         | 149         |
| 7            | 18          | 0           |
| 8            | 149         | 1           |
| 9            | 19          | 14          |
| 10           | 772         | 147         |
| 11           | 23          | 8           |
| 12           | 657         | 65          |
| 13           | 175         | 15          |
| 14           | 106         | 1           |
| 15           | 61          | 16          |
| 16           | 911         | 13          |
| 17           | 724         | 7           |
| 18           | 279         | 57          |
| 19           | 125         | 21          |
| 20           | 515         | 19          |
| 21           | 282         | 1           |
| 22           | 21          | 2           |
| 23           | 642         | 0           |
| 24           | 200         | 0           |
| <b>Total</b> | <b>8022</b> | <b>743</b>  |
